# Supplementary material
Source: Springer Nature journal article supplement (https://www.springermedizin.de/resource/supplementary/12936_2012_2554_MOESM5_ESM.pdf/9543104)

**A**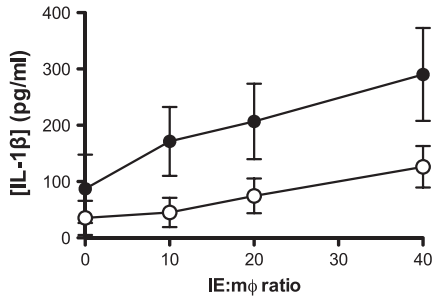**B**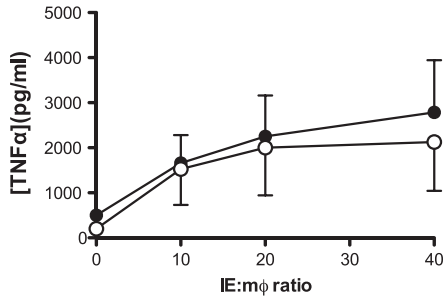**C**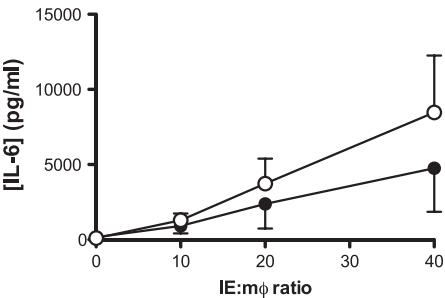**D**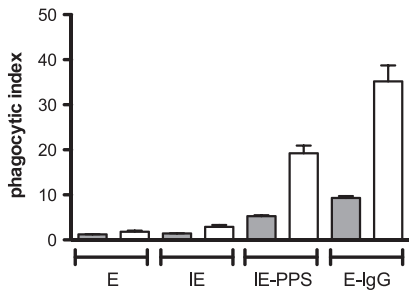

Supplement: MOESM5 [file 9543104]
